2. Rigg JR, Jamrozik K, Myles PS, Silbert BS, Peyton PJ, Parsons RW, Collins KS; MASTER Anaesthesia Trial Study Group: Epidural anaesthesia and analgesia and outcome of major surgery: A randomised trial. *Lancet* 2002; 359:1276–82
3. Magnúsdóttir H, Kírnö K, Ricksten SE, Elam M: High thoracic epidural anesthesia does not inhibit sympathetic nerve activity in the lower extremities. *ANESTHESIOLOGY* 1999; 91:1299–304
4. Liu S, Carpenter RL, Neal JM: Epidural anesthesia and analgesia. Their role in postoperative outcome. *ANESTHESIOLOGY* 1995; 82:1474–506
5. Olausson K, Magnusdottir H, Lurje L, Wennerblom B, Emanuelsson H, Ricksten SE: Anti-ischemic and anti-anginal effects of thoracic epidural anesthesia *versus* those of conventional medical therapy in the treatment of severe refractory unstable angina pectoris. *Circulation* 1997; 96:2178–82
6. Palomero Rodríguez MA, Suarez Gonzalo L, Villar Alvarez F, Varela Crespo C, Moreno Gomez Limon I, Criado Jimenez A: Thoracic epidural anesthesia decreases C-reactive protein levels in patients undergoing elective coronary artery bypass graft surgery with cardiopulmonary bypass. *Minerva Anestesiol* 2008; 74:619–26
7. Jakobsen CJ, Bhavsar R, Nielsen DV, Ryhammer PK, Sloth E, Greisen J: High thoracic epidural analgesia in cardiac surgery. Part 1—High thoracic epidural analgesia improves cardiac performance in cardiac surgery patients. *J Cardiothorac Vasc Anesth* 2012; 26:1039–47

(Accepted for publication January 24, 2014.)

## Sevoflurane- Compared with Propofol-based Anesthesia Reduces the Need for Inotropic Support in Patients Undergoing Abdominal Aortic Aneurysm Repair: Evidence of Cardioprotection by Volatile Anesthetics in Noncardiac Surgery

To the Editor:

We read with interest the study by Lindholm *et al.*<sup>1</sup> comparing cardioprotection by sevoflurane- and propofol-based anesthesia in patients undergoing elective abdominal aortic surgery. The authors chose cardiac troponin T (cTnT) release determined at one single postoperative time point as the primary endpoint of cardioprotection. No difference between the groups was found, and the authors concluded that “potential cardioprotective effects of volatile anesthetics found in cardiac surgery are less obvious in major vascular surgery.”<sup>1</sup>

We do not agree with this interpretation of the study results. Neither do we think that this study, as designed *a priori* and ultimately conducted, properly addresses the stated hypothesis. First, the cardioprotective effects of sevoflurane are not “less obvious in major vascular surgery,” but indeed *very similar* to what was reported for volatile anesthetics in previous studies with patients undergoing cardiac surgery in the on-pump<sup>2,3</sup> or off-pump mode.<sup>4,5</sup> In fact, Lindholm *et al.*<sup>1</sup> report a significantly reduced need for inotropic support in the sevoflurane

group ( $P = 0.003$ ), implying improved cardiac function and reflecting a clear advantage of the sevoflurane-based anesthesia. Unfortunately, this important finding is only briefly mentioned in the Results section and completely ignored in the Discussion. No details on the doses of dopamine and nor-adrenaline or other potentially administered inotropics such as ephedrine and/or phenylephrine are provided. From the currently available eight randomized trials evaluating volatile anesthetic-induced cardioprotection in patients undergoing off-pump coronary artery bypass graft surgery, a type of surgery which is in many aspects comparable with abdominal aortic aneurysm repair, only three of eight (37%) find reductions in cardiac troponin release, whereas four of eight (50%) find improved cardiac function or reductions in inflammatory markers. Although infarct size and the release of cardiac enzymes are the “definitive standard” of cardioprotection, they are by far not the only clinically relevant outcome measures. Cardioprotection in patient care has already reached a high standard, and any additional protection may be unable to further reduce perioperative release of myocardial necrosis markers, specifically so if the majority of patients are already treated with statins, aspirin,  $\beta$ -blockers, and thoracic epidural anesthetics. In support of this, the use of a volatile anesthetic in cardiac surgical patients potentially reduces long-term cardiovascular complications and mortality, as shown by Garcia *et al.*,<sup>6</sup> De Hert *et al.*,<sup>7</sup> and others,<sup>8,9</sup> despite the clear absence of a reduction in perioperative cardiac troponin release. This notion is compatible with the strong anti-inflammatory and potentially plaque-stabilizing actions of volatile anesthetics<sup>5</sup> during the critical perioperative period. We also think that serial postoperative determinations of cTnT should have been obtained in the study by Lindholm *et al.*<sup>1</sup> to reliably map postoperative myocardial damage, and if reporting cTnT values of a single postoperative time point, a histogram of the results displaying ranges of cTnT levels and numbers of patients would provide much more information.

Second, we think that the design of the study by Lindholm *et al.*<sup>1</sup> does not allow to directly answer the hypothesis whether a sevoflurane-based anesthesia as compared with a propofol-based anesthesia is more cardioprotective, because in their sevoflurane group, fentanyl was used as opioid whereas in the propofol group remifentanyl was used. Current clinical studies with remifentanyl suggest that its cardioprotection may render the protective effects of volatile anesthetics redundant.<sup>10–12</sup> Studying the interference in cardioprotection by volatile anesthetics, opioids and propofol in a working rat heart model, we recently demonstrated that remifentanyl maintains its protection against ischemia–reperfusion injury in combination with propofol, but does not further enhance protection by sevoflurane.<sup>13</sup> Furthermore, in the study by Lindholm *et al.*,<sup>1</sup> patients randomized to propofol-based anesthesia were clearly more aggressively treated with aspirin and  $\beta$ -blockers, making the study groups unbalanced and shifting cardioprotection in favor of the propofol group. Also,

we have recently shown that the volatile anesthetic isoflurane masks cardioprotection by remote ischemic preconditioning in patients undergoing coronary artery bypass surgery.<sup>14</sup> Hence, potential cardioprotection by remote ischemic conditioning through aortic cross-clamping, if materializing at all in anesthetized as opposed to awake patients,<sup>15</sup> may be less pronounced in the sevoflurane compared with the propofol group.

Finally, it is unfortunate that the cause of death was not available due to restrictions on the access to the registry. In such a case, a prospectively defined cardiovascular evaluation of fatal and nonfatal cardiovascular adverse events including changes in cardiovascular medications during the long-term follow-up is warranted. Unfortunately, the authors also failed to perform logistic regression analyses to identify variables independently associated with cTnT or long-term mortality. Important candidate variables would include group assignment, inotropic support, use of  $\beta$ -blockers, statins, aspirin, and heart rate. Multivariate Cox proportional hazards models should have been used to determine associations of cTnT categories with mortality after serially adjusting for traditional risk factors.

In conclusion, lack of detailed analyses seems to be a major problem of the currently available data evaluating cardioprotection by volatile anesthetics in noncardiac surgery.<sup>16</sup> In contrast to the authors themselves, we think that the study by Lindholm *et al.*<sup>1</sup> indeed suggests superior cardioprotection by sevoflurane compared with propofol in patients undergoing noncardiac surgery for abdominal aortic aneurysm repair, despite the multiple limitations and confounding issues as detailed above.

## Competing Interests

The authors declare no competing interests.

**Michael Zaugg, M.D., M.B.A., F.R.C.P.C., Eliana Lucchinetti, Ph.D.** University of Alberta, Edmonton, Alberta, Canada (M.Z.). michael.zaugg@ualberta.ca

## References

- Lindholm EE, Aune E, Norén CB, Seljeflot I, Hayes T, Otterstad JE, Kirkeboen KA: The anesthesia in abdominal aortic surgery (ABSENT) study: A prospective, randomized, controlled trial comparing troponin T release with fentanyl-sevoflurane and propofol-remifentanyl anesthesia in major vascular surgery. *ANESTHESIOLOGY* 2013; 119:802–12
- Julier K, da Silva R, Garcia C, Bestmann L, Frascarolo P, Zollinger A, Chassot PG, Schmid ER, Turina MI, von Segesser LK, Pasch T, Spahn DR, Zaugg M: Preconditioning by sevoflurane decreases biochemical markers for myocardial and renal dysfunction in coronary artery bypass graft surgery: A double-blinded, placebo-controlled, multicenter study. *ANESTHESIOLOGY* 2003; 98:1315–27
- Lu CC, Ho ST, Wang JJ, Wong CS, Tsai CS, Chang SY, Lin CY: Minimal low-flow isoflurane-based anesthesia benefits patients undergoing coronary revascularization *via* preventing hyperglycemia and maintaining metabolic homeostasis. *Acta Anaesthesiol Sin* 2003; 41:165–72
- Bein B, Renner J, Caliebe D, Scholz J, Paris A, Fraund S, Zaehle W, Tonner PH: Sevoflurane but not propofol preserves myocardial function during minimally invasive direct coronary artery bypass surgery. *Anesth Analg* 2005; 100:610–6
- Lucchinetti E, Hofer C, Bestmann L, Hersberger M, Feng J, Zhu M, Furrer L, Schaub MC, Tavakoli R, Genoni M, Zollinger A, Zaugg M: Gene regulatory control of myocardial energy metabolism predicts postoperative cardiac function in patients undergoing off-pump coronary artery bypass graft surgery: Inhalational *versus* intravenous anesthetics. *ANESTHESIOLOGY* 2007; 106:444–57
- Garcia C, Julier K, Bestmann L, Zollinger A, von Segesser LK, Pasch T, Spahn DR, Zaugg M: Preconditioning with sevoflurane decreases PECAM-1 expression and improves one-year cardiovascular outcome in coronary artery bypass graft surgery. *Br J Anaesth* 2005; 94:159–65
- De Hert S, Vlasselaers D, Barbé R, Ory JP, Dekegel D, Donnadonni R, Demeere JL, Mulier J, Wouters P: A comparison of volatile and non volatile agents for cardioprotection during on-pump coronary surgery. *Anaesthesia* 2009; 64:953–60
- Bignami E, Biondi-Zoccai G, Landoni G, Fochi O, Testa V, Sheiban I, Giunta F, Zangrillo A: Volatile anesthetics reduce mortality in cardiac surgery. *J Cardiothorac Vasc Anesth* 2009; 23:594–9
- Jakobsen CJ, Berg H, Hindsholm KB, Faddy N, Sloth E: The influence of propofol *versus* sevoflurane anesthesia on outcome in 10,535 cardiac surgical procedures. *J Cardiothorac Vasc Anesth* 2007; 21:664–71
- Kim TY, Kim DK, Yoon TG, Lim JA, Woo NS, Chee HK, Shin JK, Song MG, Kim SH: Myocardial injury in remifentanyl-based anaesthesia for off-pump coronary artery bypass surgery: An equipotent dose of sevoflurane *versus* propofol. *Anaesth Intensive Care* 2011; 39:418–25
- Law-Koune JD, Raynaud C, Liu N, Dubois C, Romano M, Fischler M: Sevoflurane-remifentanyl *versus* propofol-remifentanyl anesthesia at a similar bispectral level for off-pump coronary artery surgery: No evidence of reduced myocardial ischemia. *J Cardiothorac Vasc Anesth* 2006; 20:484–92
- Wong GT, Huang Z, Ji S, Irwin MG: Remifentanyl reduces the release of biochemical markers of myocardial damage after coronary artery bypass surgery: A randomized trial. *J Cardiothorac Vasc Anesth* 2010; 24:790–6
- Zaugg M, Wang L, Zhang L, Lou PH, Lucchinetti E, Clanachan AS: Choice of anesthetic combination determines  $Ca^{2+}$  leak after ischemia-reperfusion injury in the working rat heart: Favorable *versus* adverse combinations. *ANESTHESIOLOGY* 2012; 116:648–57
- Lucchinetti E, Bestmann L, Feng J, Freidank H, Clanachan AS, Finegan BA, Zaugg M: Remote ischemic preconditioning applied during isoflurane inhalation provides no benefit to the myocardium of patients undergoing on-pump coronary artery bypass graft surgery: Lack of synergy or evidence of antagonism in cardioprotection? *ANESTHESIOLOGY* 2012; 116:296–310
- Zaugg M, Lucchinetti E, Clanachan A, Finegan B: Remote ischemic preconditioning is redundant in patients undergoing coronary artery bypass graft surgery who are already protected by volatile anesthetics. *Circ Res* 2012; 110:e42–3; author reply e44–5
- Zaugg M, Lucchinetti E: Letter by Zaugg and Lucchinetti regarding article, “Randomized comparison of sevoflurane *versus* propofol to reduce perioperative myocardial ischemia in patients undergoing noncardiac surgery”. *Circulation* 2013; 127:e875

(Accepted for publication January 24, 2014.)
